# Supplementary material for: An efficient and improved method for virus-induced gene silencing in sorghum
Source: PubMed Central journal article supplement (PMC6006947; doi:10.1186/s12870-018-1344-z), 2018-06-18
Supplement: 12870_2018_1344_MOESM1_ESM.pdf [file 12870_2018_1344_MOESM1_ESM.pdf]

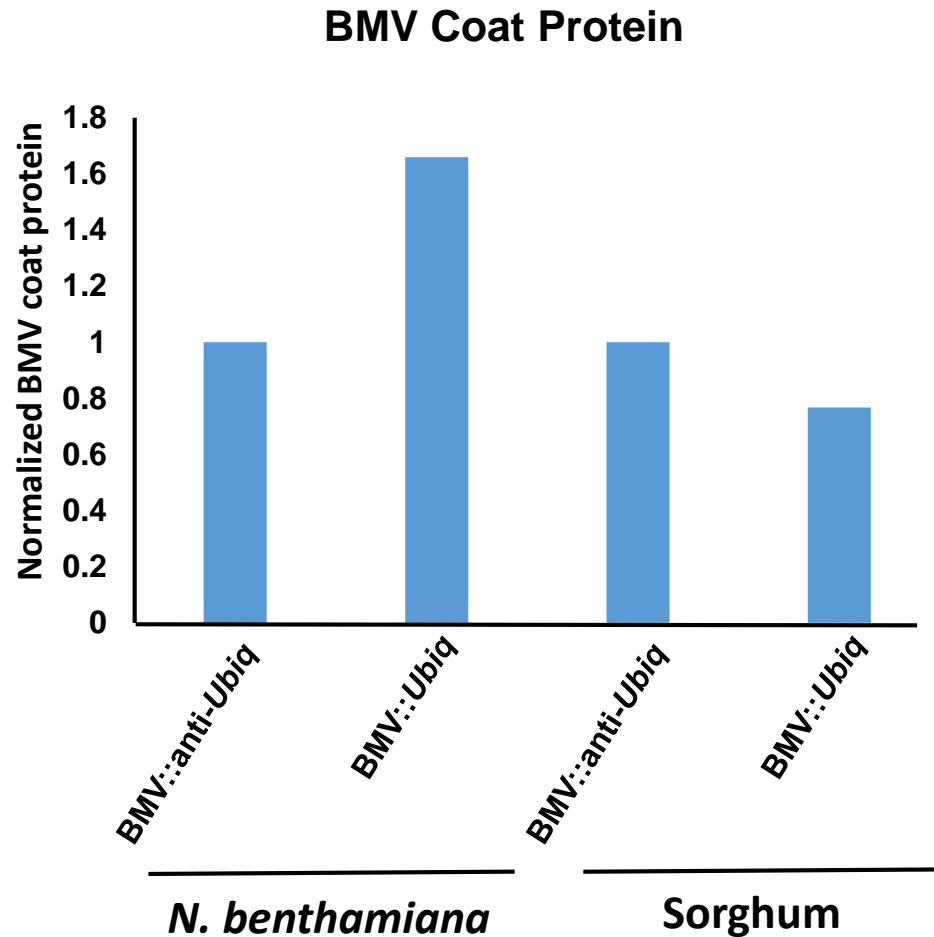

**Supplementary Figure S1.** BMV capsid protein quantification. BMV level was analyzed by western blot using an antibody against BMV coat protein. The capsid protein was normalized with Actin protein of the plants. In *N. benthamiana*, the BMV level was more in the BMV::Ubiq infected plant compared to BMV::anti-Ubiq infected plant. In sorghum, BMV level is similar in both BMV::anti-Ubiq and BMV::Ubiq infected plants.
